# Supplementary material
Source: ML conference proceedings conference paper supplement (https://openaccess.thecvf.com/content/CVPR_2019/html/Gutierrez-Barragan_Practical_Coding_Function_CVPR_2019_paper.html)
Supplement: Supplementary file 2 [file Gutierrez-Barragan_Practical_Coding_Function_CVPR_2019_supplemental.zip]

Archive with 3 entries (3 files):
- PracticalToFCodeDesign_SupplementaryVideo.mp4
- README.txt
- v1_supplement_ToFCodeDesign_cameraready.pdf
