# Supplementary material
Source: ML conference proceedings conference paper supplement (https://openaccess.thecvf.com/content/CVPR_2019/html/Gutierrez-Barragan_Practical_Coding_Function_CVPR_2019_paper.html)
Supplement: Supplementary file 2 [file Gutierrez-Barragan_Practical_Coding_Function_CVPR_2019_supplemental.zip › README.txt]

Supplementary Material for "Practical Coding Function Design for Time-of-Flight Imaging"

- PracticalToFCodeDesign_SupplementaryVideo.mp4 - Video overview of the paper.
- v1_supplement_ToFCodeDesign_cameraready.pdf - Supplementary document. The results included in this document are referenced throughout the paper.
